# Supplementary material for: Synthesis of diverse cyclic-brush polymers with cyclic polystyrene as a universal template via a grafting-from approach
Source: Royal Society of Chemistry journal article supplement (doi:10.1039/c6py00012f), 2016-01-01
Supplement: c6py00012f1.pdf [file c6py00012f1.pdf]

**Supporting Information for**  
**Synthesis of Diverse Cyclic-Brush Polymers with Cyclic Polystyrene**  
**as Universal Template *via* Grafting-from Approach**

*Shuangshuang Zhang, Lu Yin, Wei Zhang\*, Zhengbiao Zhang\* and Xiulin Zhu\**

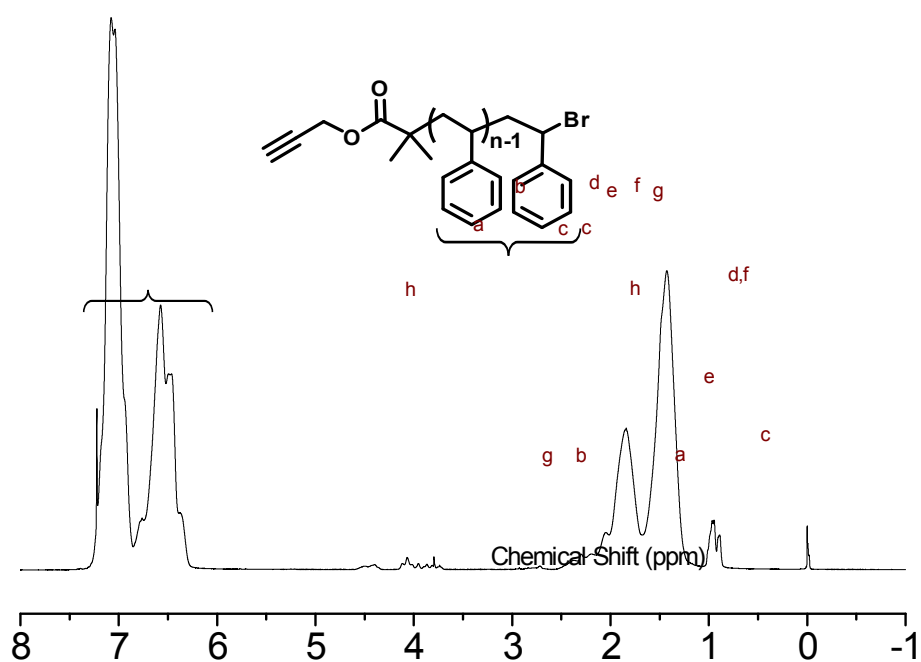

**Fig. S1.** Full <sup>1</sup>H NMR (300 MHz) spectrum of linear polystyrene (*l*-PS) precursor in CDCl<sub>3</sub>.

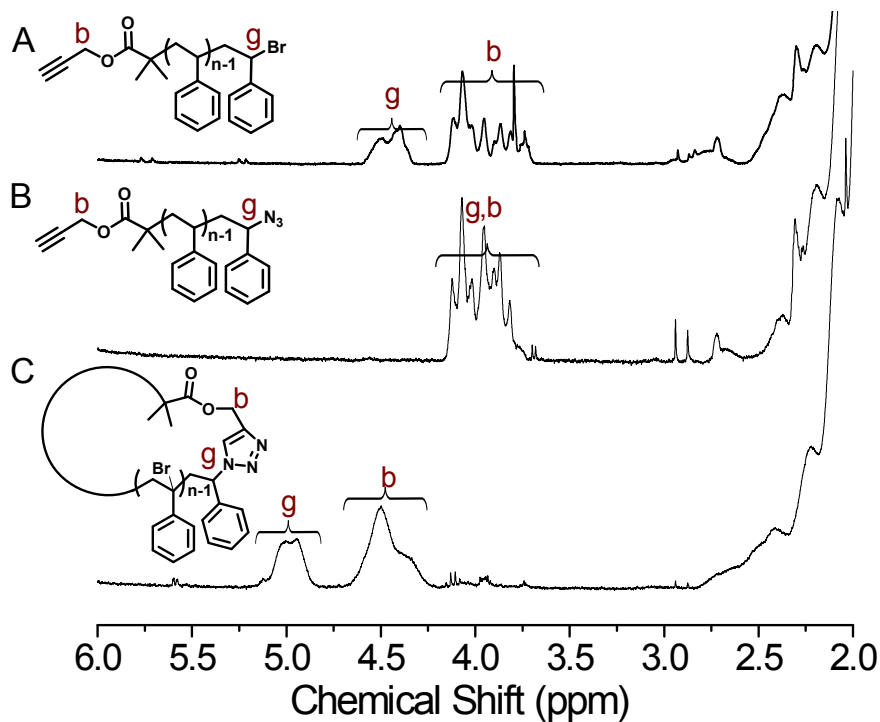

**Fig. S2.** Expanded <sup>1</sup>H NMR (300 MHz) spectra of (A) *l*-PS, (B) *l*-PS-N<sub>3</sub> and (C) purified *c*-PS in CDCl<sub>3</sub>.

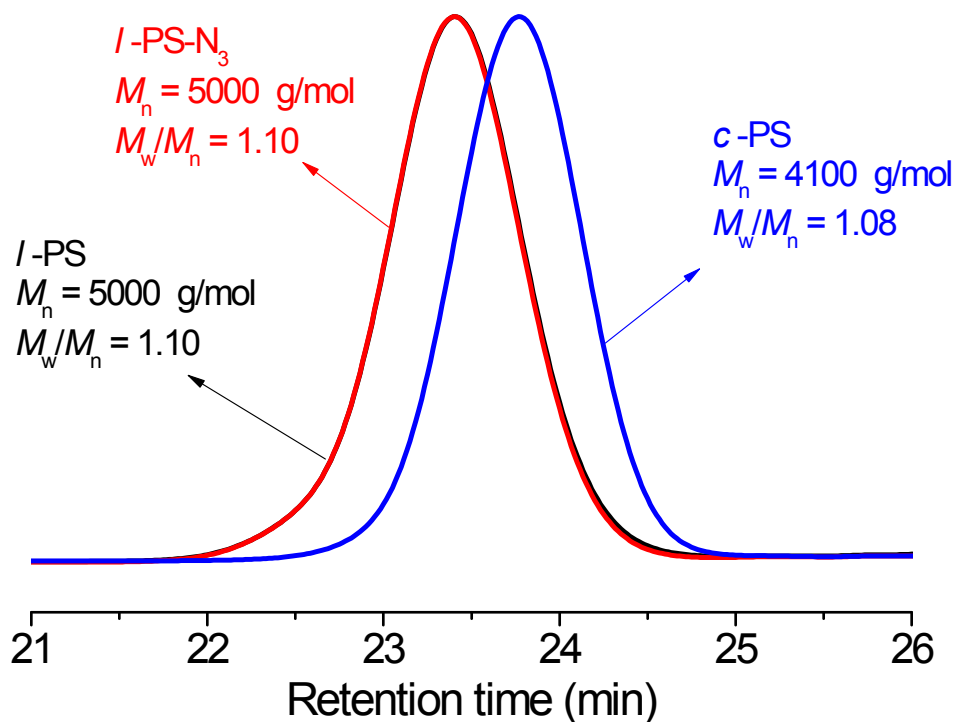

**Fig. S3.** GPC traces of *l*-PS, *l*-PS-N<sub>3</sub> and purified *c*-PS. DMF as the eluent and calibration with PS standards.

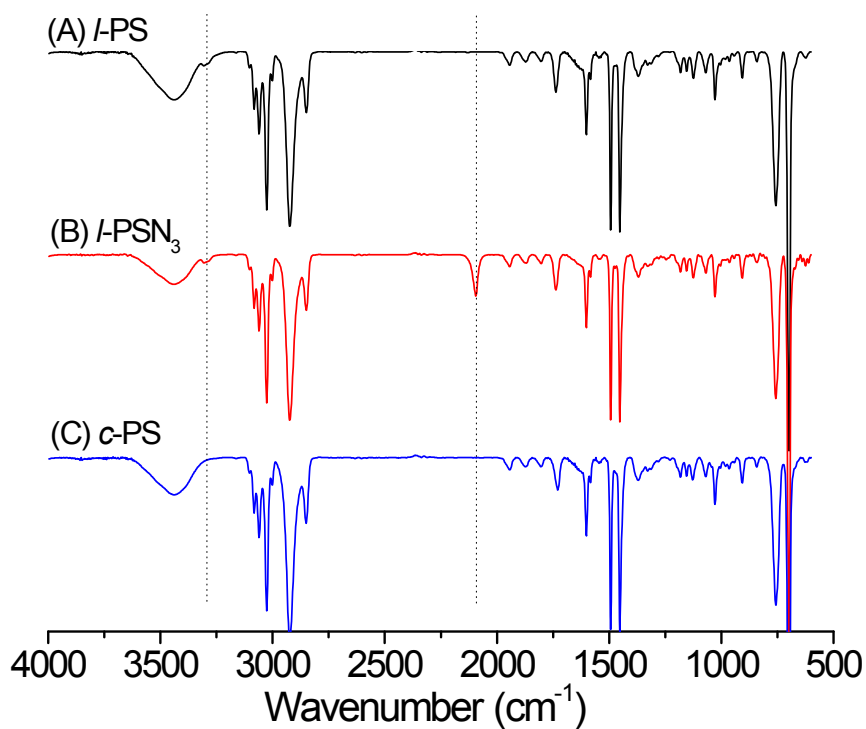

**Fig. S4.** FT-IR spectra of *l*-PS, *l*-PS-N<sub>3</sub> and purified *c*-PS.

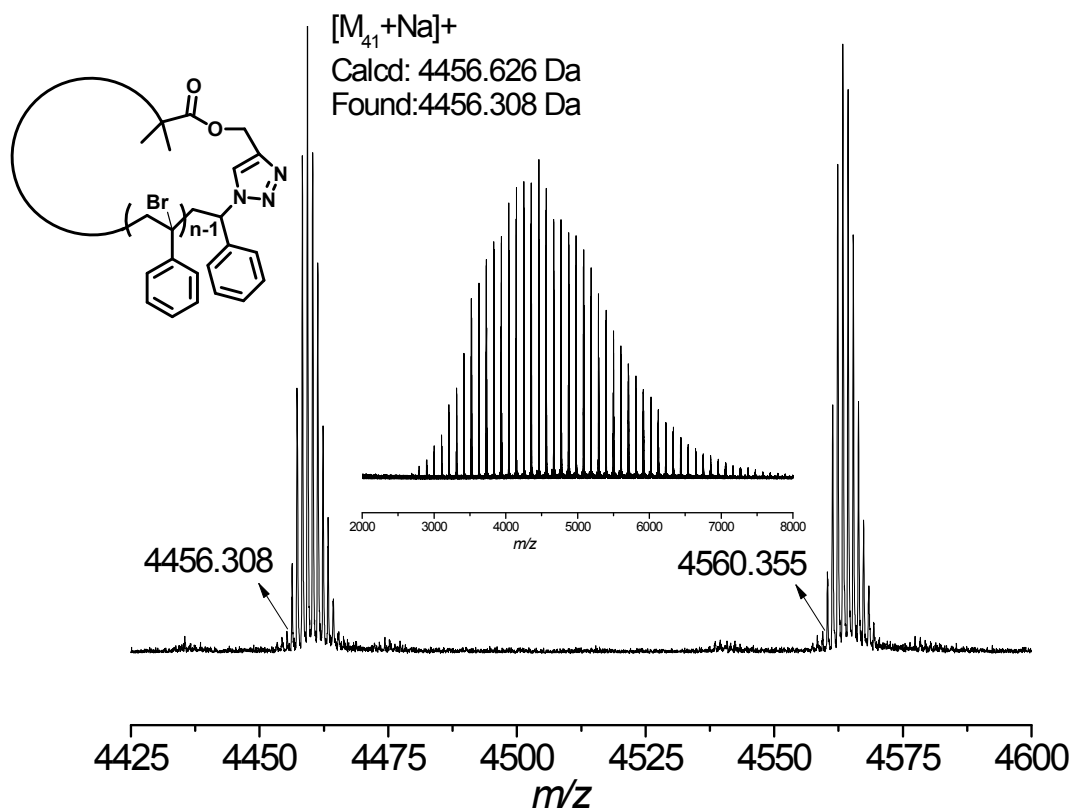

**Fig. S5.** Expanded MALDI-TOF mass spectra of purified cyclic polystyrene (*c*-PS) with the inserted full spectra.

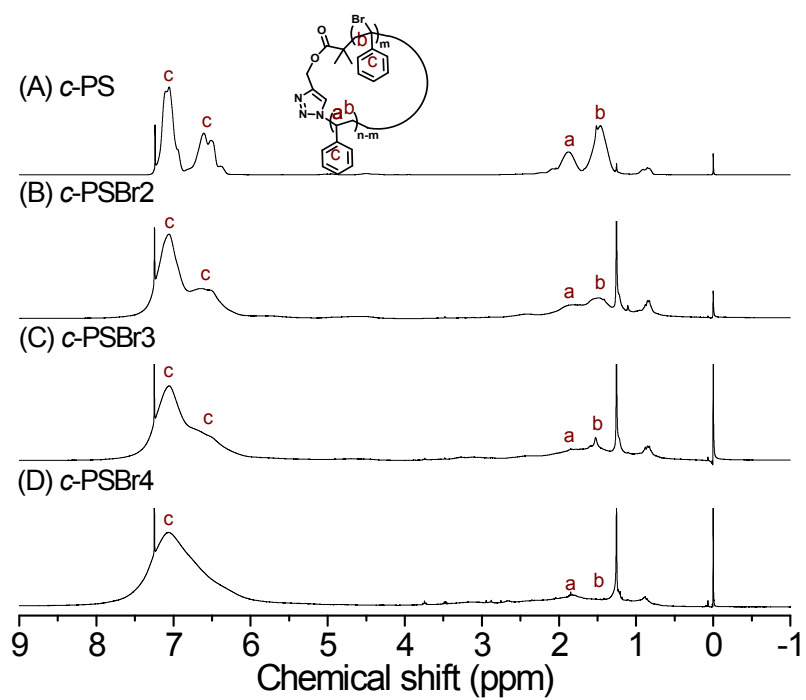

**Fig. S6.**  $^1\text{H}$  NMR (300 MHz) spectra of (A) *c*-PS, (B) *c*-PSBr<sub>2</sub>, (C) *c*-PSBr<sub>3</sub> and (D) *c*-PSBr<sub>4</sub> ( $\text{CDCl}_3$ ).

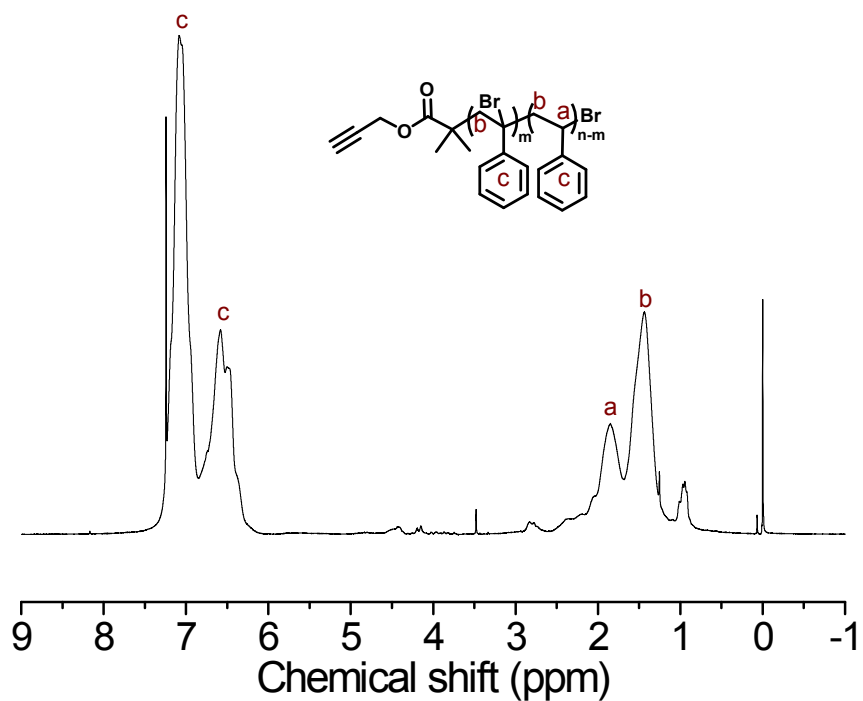

**Fig. S7.**  $^1\text{H}$  NMR (300 MHz) spectra of *l*-PSBr (Br mol % < 10%) at 55 °C ( $\text{CDCl}_3$ ).

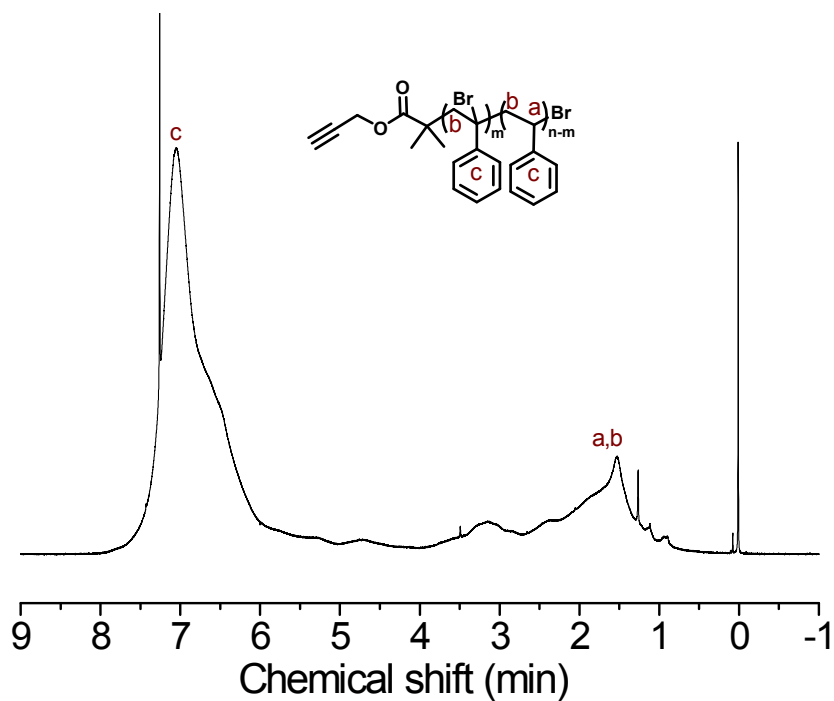

**Fig. S8.** <sup>1</sup>H NMR (600 MHz) spectra of *l*-PSBr (Br mol %  $\approx$  50%) (CDCl<sub>3</sub>).

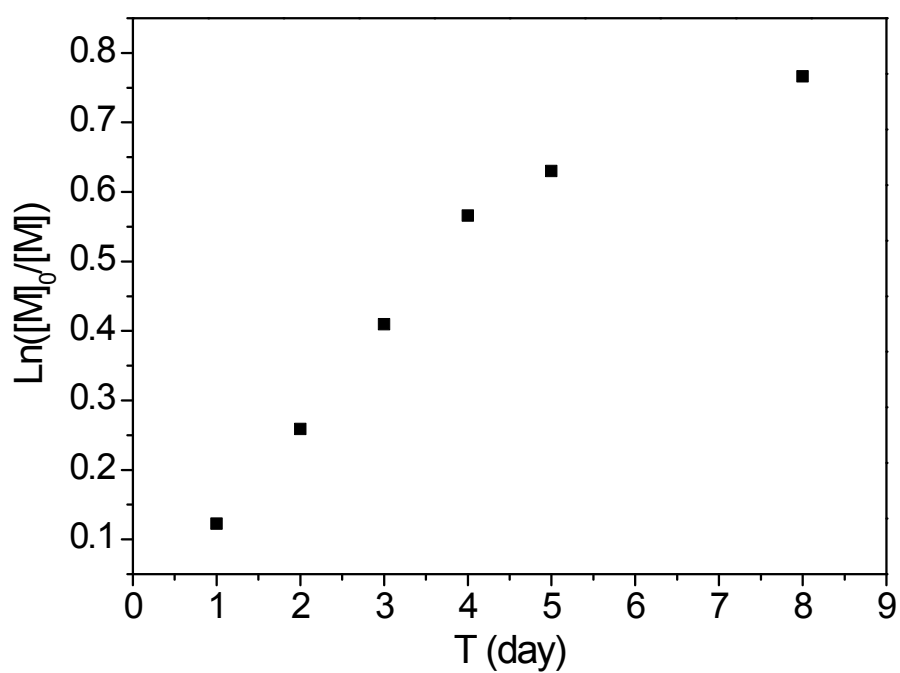

**Fig. S9.**  $\ln([M]_0/[M])$  vs polymerization time for grafting polymerization of St with *c*-PSBr1 as ATRP macroinitiator at 90 °C.

**Table S1.** Experimental results from graft polymerization of St with *c*-PSBr2 as macroinitiator, using CuBr/PMDETA as catalyst system at 90 °C under different time.

| Entry | t<br>(day) | $M_{n, \text{GPC}}$<br>(g/mol) <sup>a</sup> | $M_w/M_n^a$ | Conv. <sup>b</sup><br>(%) | $T_g$<br>(°C) |
|-------|------------|---------------------------------------------|-------------|---------------------------|---------------|
| 1     | 0.5        | 21100                                       | 1.08        | 10.30                     | 105.78        |
|       |            | 56300                                       | 1.12        |                           |               |
| 2     | 1          | 151600                                      | 1.26        | 23.82                     | 106.13        |
|       |            | 42000                                       | 1.18        |                           |               |
| 3     | 2          | 330600                                      | 1.39        | 34.39                     | 106.93        |
|       |            | 71400                                       | 1.28        |                           |               |
| 4     | 3          | 273800                                      | 1.49        | 41.36                     | 107.80        |
|       |            | 55300                                       | 1.30        |                           |               |
| 5     | 4          | 190800                                      | 2.56        | 48.57                     | 106.83        |

$[c\text{-PSBr}_2]_0 : [\text{St}]_0 : [\text{CuBr}]_0 : [\text{PMDETA}]_0 = 1 : 100 : 1 : 1$ ; *c*-PSBr2 (25.3 mol%Br)  
 Calculated by elementary analysis; <sup>a</sup>From GPC measurement calibrated by PS standards; <sup>b</sup>Conversion calculated by gravimetric method.

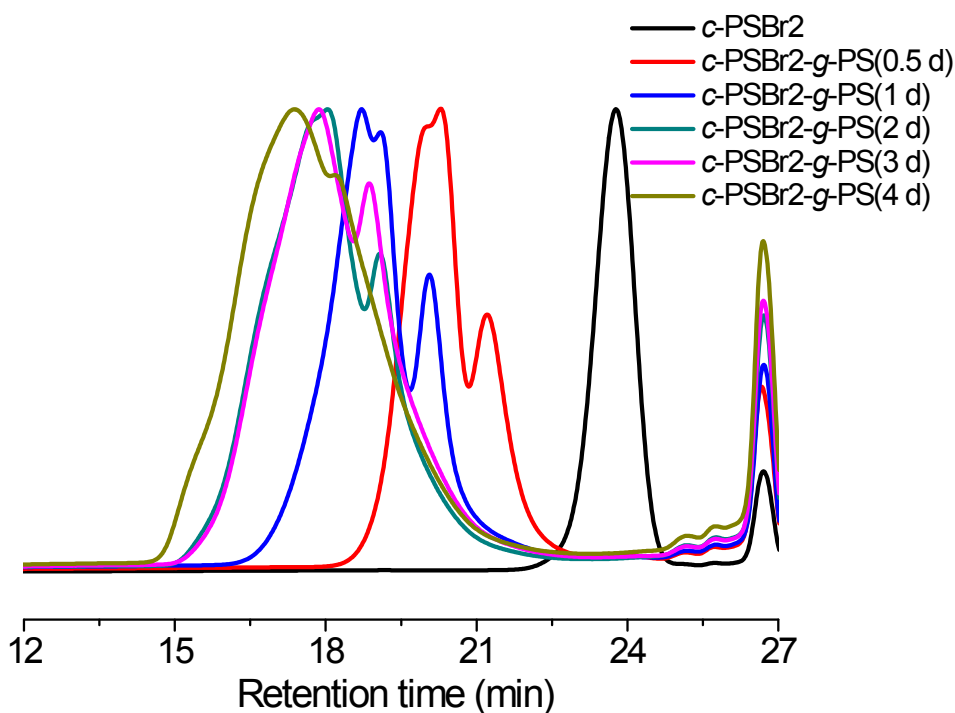

**Fig. S10.** GPC curves of *c*-PSBr2 (25.3%) and a series of cyclic-brush polymers prepared with *c*-PSBr2 as macroinitiator. THF as the eluent and calibration with PS standards.

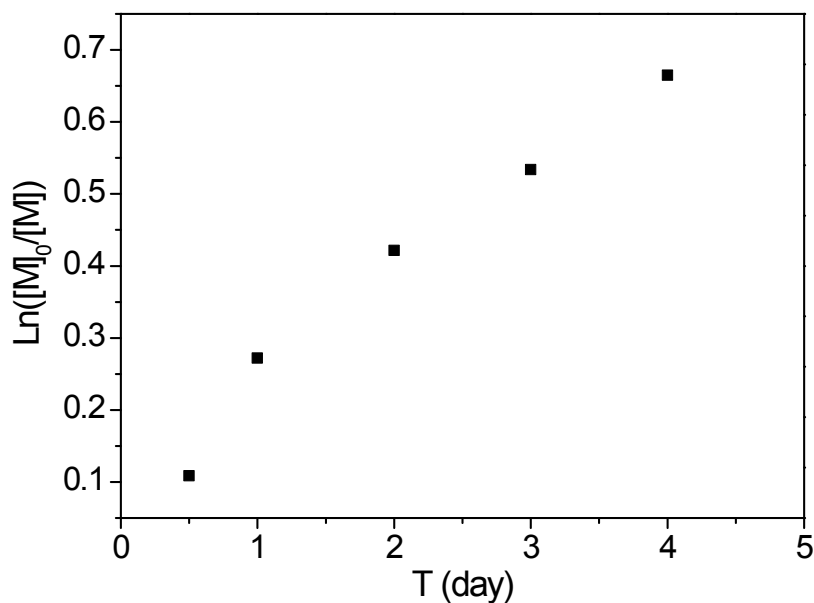

**Fig. S11.** Ln ( $[M_0]/ [M]$ ) vs polymerization time for grafting polymerization of St with *c*-PSBr2 as macroinitiator at 90 °C.

**Table S2.** Experimental results from the graft polymerization of St with *c*-PSBr4 as macroinitiator, using CuBr/PMDETA as catalyst system at 90 °C under different time.

| Entry | t<br>(day) | $M_{n, GPC}$<br>(g/mol) <sup>a</sup> | $M_w/M_n$ <sup>a</sup> | Conv. <sup>b</sup><br>(%) | $T_g$<br>(°C) |   |   |        |      |       |        |       |      |        |      |        |        |       |        |        |      |        |        |        |        |       |        |        |      |        |        |       |        |   |   |
|-------|------------|--------------------------------------|------------------------|---------------------------|---------------|---|---|--------|------|-------|--------|-------|------|--------|------|--------|--------|-------|--------|--------|------|--------|--------|--------|--------|-------|--------|--------|------|--------|--------|-------|--------|---|---|
| 1     | 0.5        | 44200                                | 1.16                   | 5.08                      | 104.02        |   |   |        |      |       |        |       |      |        |      |        |        |       |        |        |      |        |        |        |        |       |        |        |      |        |        |       |        |   |   |
|       |            | 16100                                | 1.08                   |                           |               | 2 | 1 | 106900 | 1.16 | 12.10 | 101.68 | 34400 | 1.19 | 3      | 2    | 208400 | 1.18   | 21.31 | 105.49 | 53200  | 1.34 | 4      | 3      | 104100 | 2.24   | 35.66 | 105.28 | 5      | 4    | 116000 | 2.49   | 45.09 | 105.40 | 6 | 8 |
| 2     | 1          | 106900                               | 1.16                   | 12.10                     | 101.68        |   |   |        |      |       |        |       |      |        |      |        |        |       |        |        |      |        |        |        |        |       |        |        |      |        |        |       |        |   |   |
|       |            | 34400                                | 1.19                   |                           |               | 3 | 2 | 208400 | 1.18 | 21.31 | 105.49 | 53200 | 1.34 | 4      | 3    | 104100 | 2.24   | 35.66 | 105.28 | 5      | 4    | 116000 | 2.49   | 45.09  | 105.40 | 6     | 8      | 124200 | 2.37 | 54.38  | 105.23 |       |        |   |   |
| 3     | 2          | 208400                               | 1.18                   | 21.31                     | 105.49        |   |   |        |      |       |        |       |      |        |      |        |        |       |        |        |      |        |        |        |        |       |        |        |      |        |        |       |        |   |   |
|       |            | 53200                                | 1.34                   |                           |               | 4 | 3 | 104100 | 2.24 | 35.66 | 105.28 | 5     | 4    | 116000 | 2.49 | 45.09  | 105.40 | 6     | 8      | 124200 | 2.37 | 54.38  | 105.23 |        |        |       |        |        |      |        |        |       |        |   |   |
| 4     | 3          | 104100                               | 2.24                   | 35.66                     | 105.28        |   |   |        |      |       |        |       |      |        |      |        |        |       |        |        |      |        |        |        |        |       |        |        |      |        |        |       |        |   |   |
| 5     | 4          | 116000                               | 2.49                   | 45.09                     | 105.40        |   |   |        |      |       |        |       |      |        |      |        |        |       |        |        |      |        |        |        |        |       |        |        |      |        |        |       |        |   |   |
| 6     | 8          | 124200                               | 2.37                   | 54.38                     | 105.23        |   |   |        |      |       |        |       |      |        |      |        |        |       |        |        |      |        |        |        |        |       |        |        |      |        |        |       |        |   |   |

$[c\text{-PSBr4}]_0 : [St]_0 : [CuBr]_0 : [PMDETA]_0 = 1 : 100 : 1 : 1$ ; *c*-PSBr2 (50.3 mol%Br)

Calculated by elementary analysis; <sup>a</sup>From GPC measurement calibrated by PS standard; <sup>b</sup>Conversion calculated by gravimetric method.

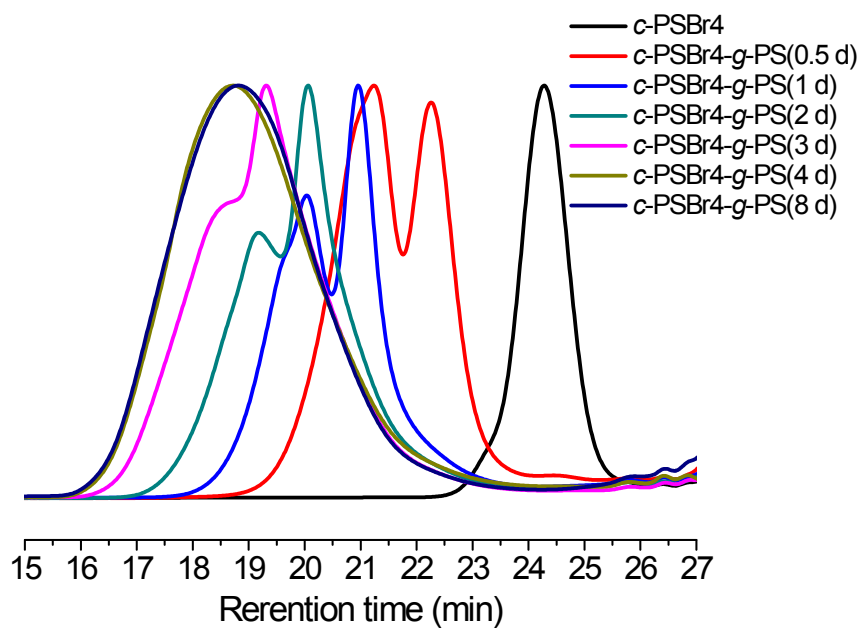

**Fig. S12.** GPC curves of *c*-PSBr4 (50.3%) and a series of cyclic-brush polymers prepared with *c*-PSBr4 as macroinitiator. THF as the eluent and calibration with PS standards.

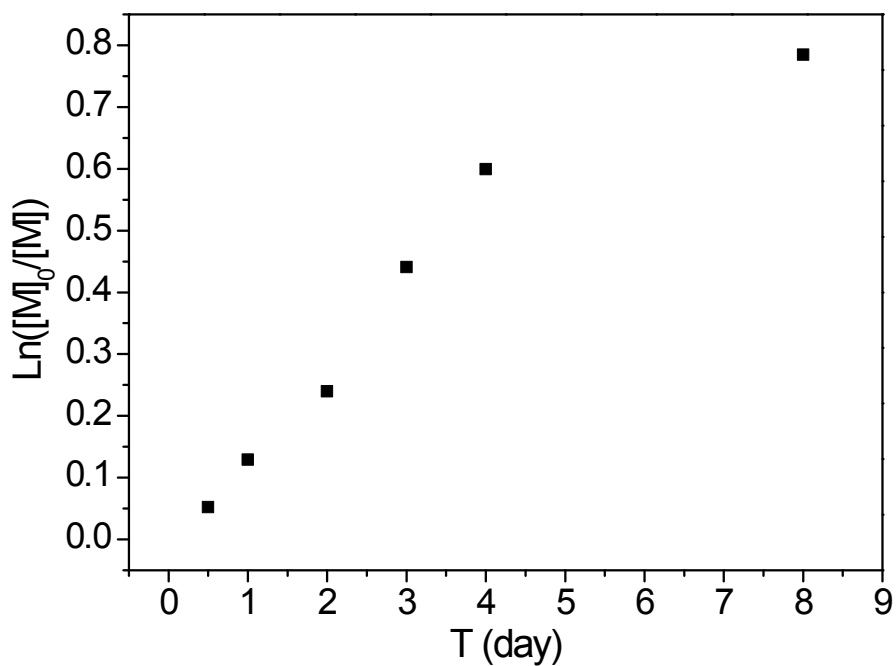

**Fig. S13.**  $\ln([M]_0/[M])$  vs polymerization time for grafting polymerization of St with *c*-PSBr4 as macroinitiator at 90 °C.



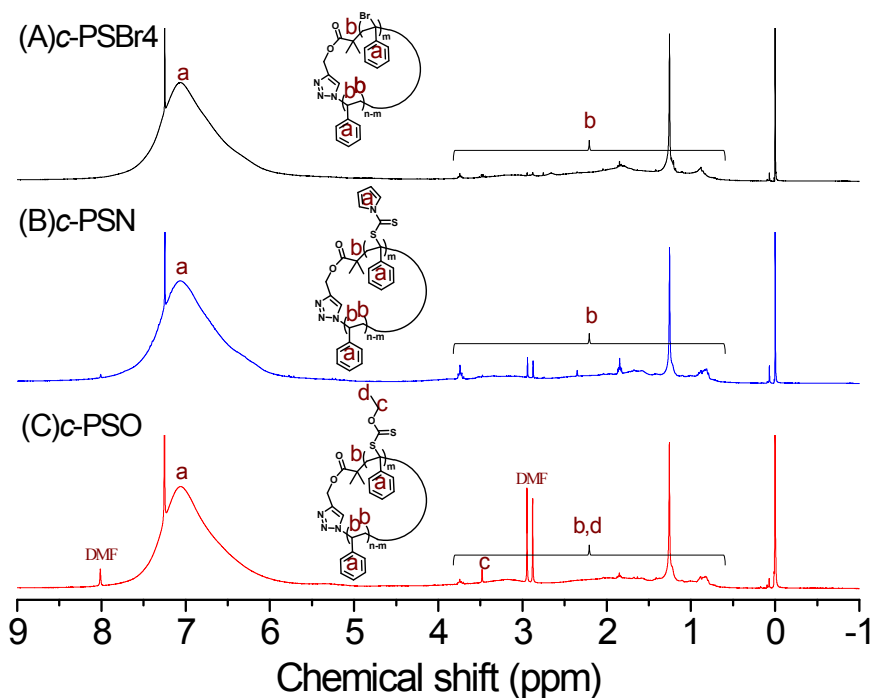

**Fig. S14.**  $^1\text{H}$  NMR (300 MHz) spectra of (A) *c*-PSBr<sub>4</sub>, (B) *c*-PSN and (C) *c*-PSO in  $\text{CDCl}_3$ .

**Table S3.** Experimental results from the graft polymerization of St with *c*-PSN/AIBN/toluene system at 90 °C under different time.

| Entry | t (h) | $M_{n,\text{GPC}}$ (g/mol) <sup>a</sup> | $M_{w,\text{GPC}}$ (g/mol) <sup>a</sup> | $M_w/M_n^a$ | Conv. <sup>b</sup> (%) |
|-------|-------|-----------------------------------------|-----------------------------------------|-------------|------------------------|
| 1     | 1     | 19200                                   | 29400                                   | 1.53        | 22.70                  |
| 2     | 3     | 21100                                   | 35300                                   | 1.67        | 37.96                  |
| 3     | 6     | 23700                                   | 40400                                   | 1.70        | 40.14                  |
| 4     | 12    | 30300                                   | 54800                                   | 1.81        | 47.80                  |
| 5     | 24    | 29200                                   | 59800                                   | 2.05        | 52.03                  |
| 6     | 48    | 40200                                   | 97600                                   | 2.43        | 67.45                  |

$[c\text{-PSN}]_0 : [\text{St}]_0 : [\text{AIBN}]_0 = 1 : 200 : 0.5$ ; <sup>a</sup>From GPC measurement calibrated by standard PS; <sup>b</sup>Conversion calculated by gravimetric method.

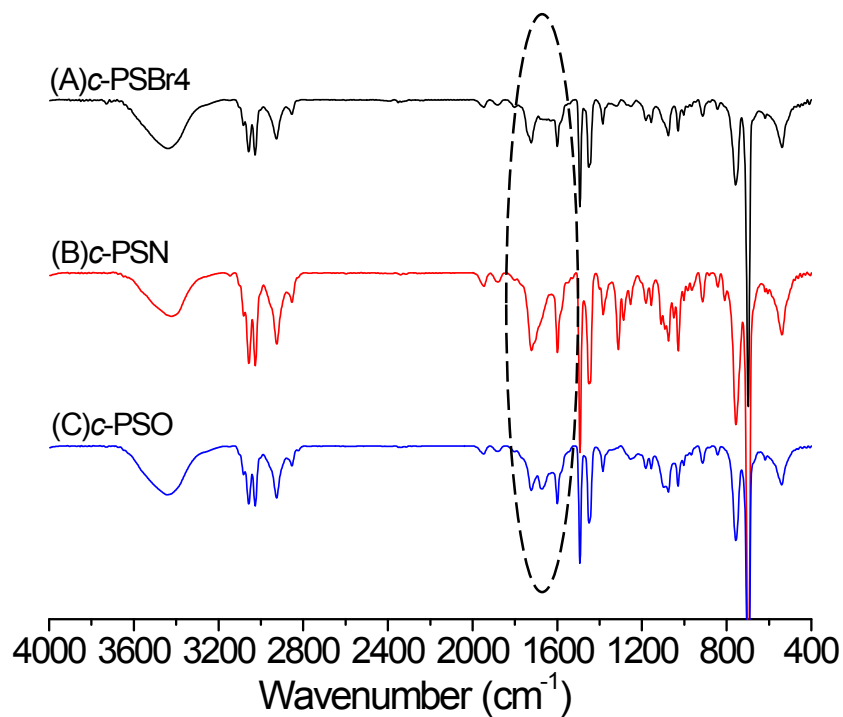

**Fig. S15.** FT-IR spectra of (A) *c*-PSBr<sub>4</sub>, (B) *c*-PSN and (C) *c*-PSO.

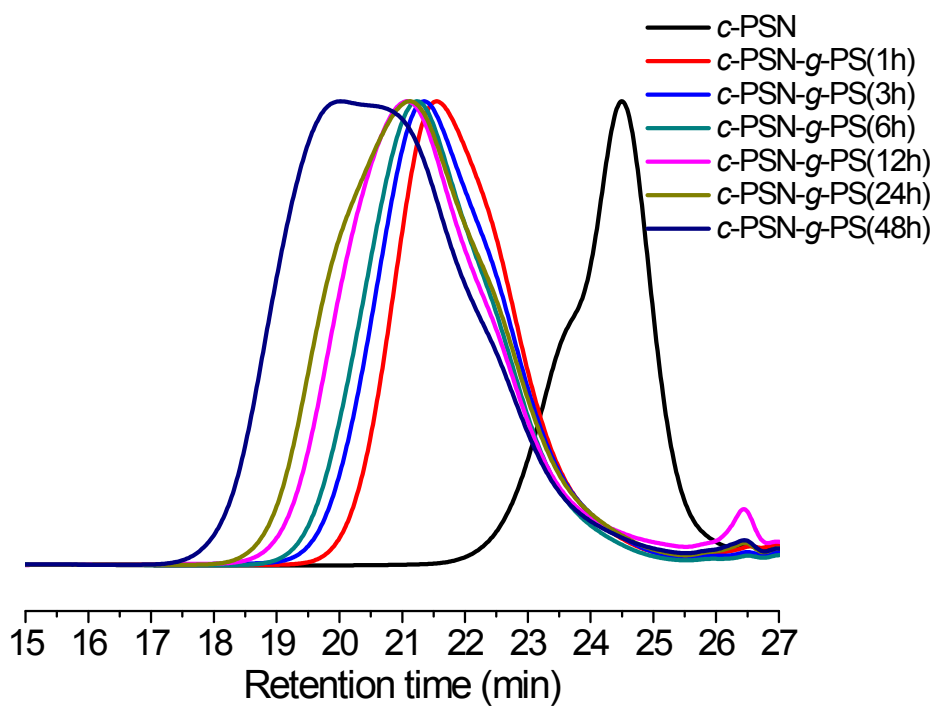

**Fig. S16.** GPC curves of *c*-PSBr<sub>N</sub> and a series of cyclic-brush polymers prepared with *c*-PSBr<sub>N</sub> as macro-RAFT agent. THF as the eluent and calibration with PS standards.

**Table S4.** Experimental results from the graft polymerization of VAc with *c*-PSO/AIBN/1, 4-dioxane system at 70 °C under different time.

| Entry | t (h) | $M_{n, \text{GPC}}$ (g/mol) <sup>a</sup> | $M_{w, \text{GPC}}$ (g/mol) <sup>a</sup> | $M_w/M_n^a$ | Conv. <sup>b</sup> (%) |
|-------|-------|------------------------------------------|------------------------------------------|-------------|------------------------|
| 1     | 2     | 15000                                    | 27900                                    | 1.85        | 11.96                  |
| 2     | 3     | 16500                                    | 28900                                    | 1.75        | 31.70                  |
| 3     | 4     | 20000                                    | 33600                                    | 1.68        | 36.94                  |
| 4     | 6     | 20300                                    | 33300                                    | 1.64        | 53.46                  |
| 5     | 12    | 18600                                    | 31600                                    | 1.71        | 70.11                  |

$[c\text{-PSO}]_0 : [\text{VAc}]_0 : [\text{AIBN}]_0 = 1 : 200 : 0.5$ ; <sup>a</sup>From GPC measurement calibrated by standard PS; <sup>b</sup> Conversion calculated by gravimetric method.

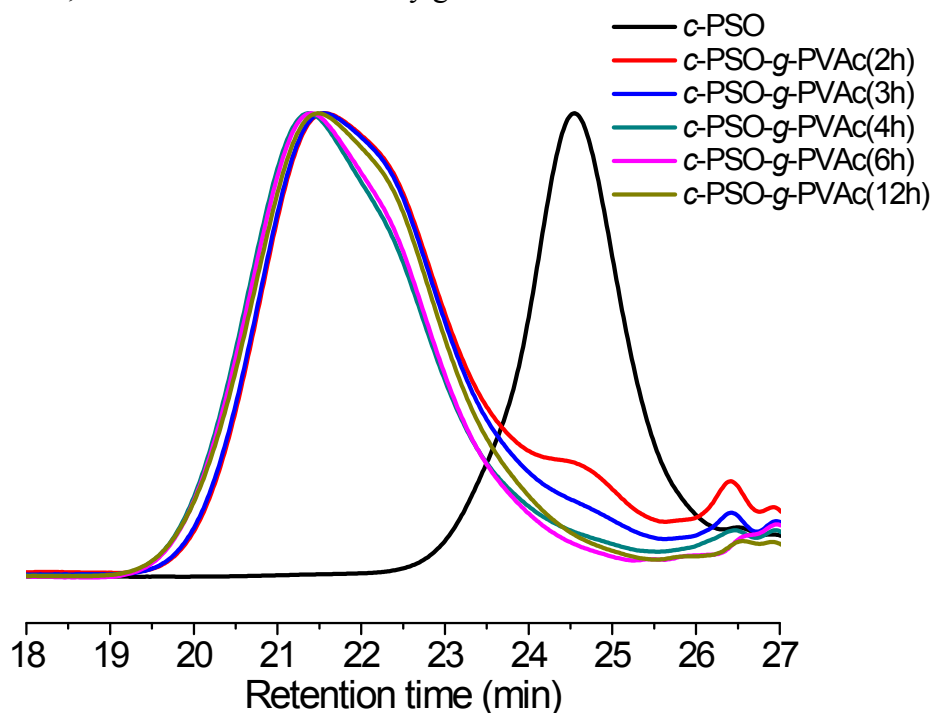

**Fig. S17.** GPC curves of *c*-PSO and a series of cyclic-brush polymers prepared with *c*-PSO as macro-RAFT agent. THF as the eluent and calibration with PS standards.

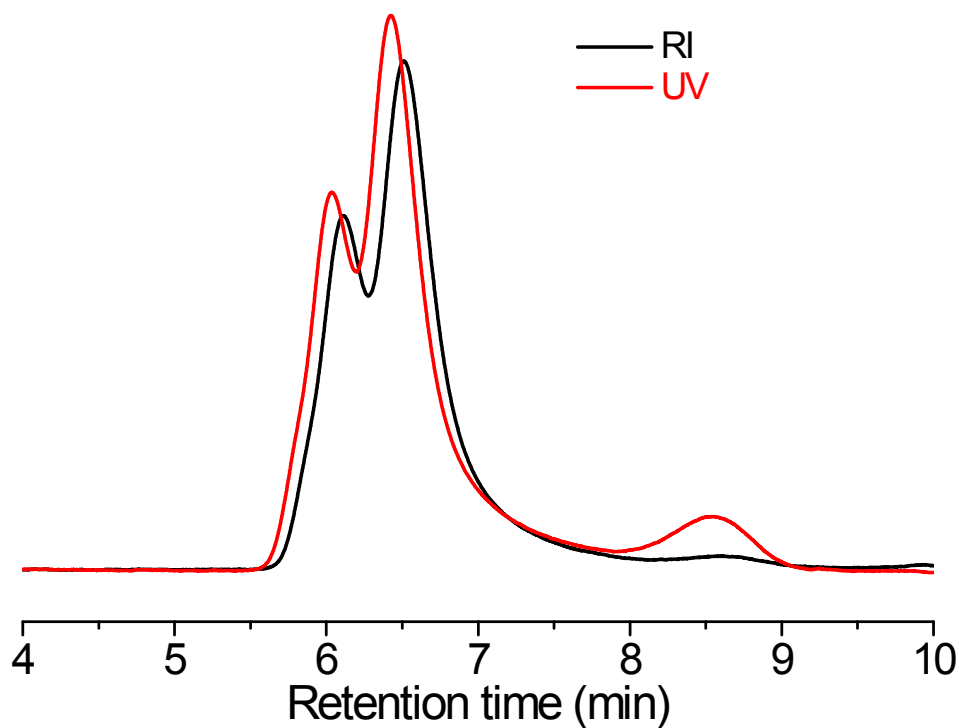

**Fig. S18.** GPC curves of *c*-PSBr1-g-PS (polymerization time 24 h) gained by GPC dual detection (RI/UV) technique.
